# Supplementary material for: 30-year lidar observations of the stratospheric aerosol layer state over Tomsk (Western Siberia, Russia)
Source: Copernicus journal article supplement (doi:10.5194/acp-17-3067-2017), 2017-02-28
Supplement: Supplementary file [file acp-17-3067-2017-supplement-title-page.pdf › acp-17-3067-2017-supplement-title-page.pdf]

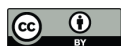

## *Supplement of*

# **30-year lidar observations of the stratospheric aerosol layer state over Tomsk (Western Siberia, Russia)**

**V. V. Zuev et al.**

*Correspondence to:* Vladislav V. Gerasimov (gvvsnafe@mail.ru)

- [acp-17-3067-2017-supplement-title-page.pdf](#)
- [Data for Figure 1.opj](#)
- [Data for Figure 10.opj](#)
- [Data for Figure 12.opj](#)
- [Data for Figure 13.opj](#)
- [Data for Figure 14.opj](#)
- [Data for Figure 15.opj](#)
- [Data for Figure 2.opj](#)
- [Data for Figure 3.opj](#)
- [Data for Figure 4.opj](#)
- [Data for Figure 5a.opj](#)
- [Data for Figure 5b.opj](#)
- [Data for Figure 7.opj](#)
- [Data for Figure 8.opj](#)

The copyright of individual parts of the supplement might differ from the CC-BY 3.0 licence.
